# Supplementary material
Source: HighWire-hosted journal article supplement (https://bmjopen.bmj.com/content/6/10/e011735)

## Supplementary Figure

Supplementary Figure – Flow of participants through the study

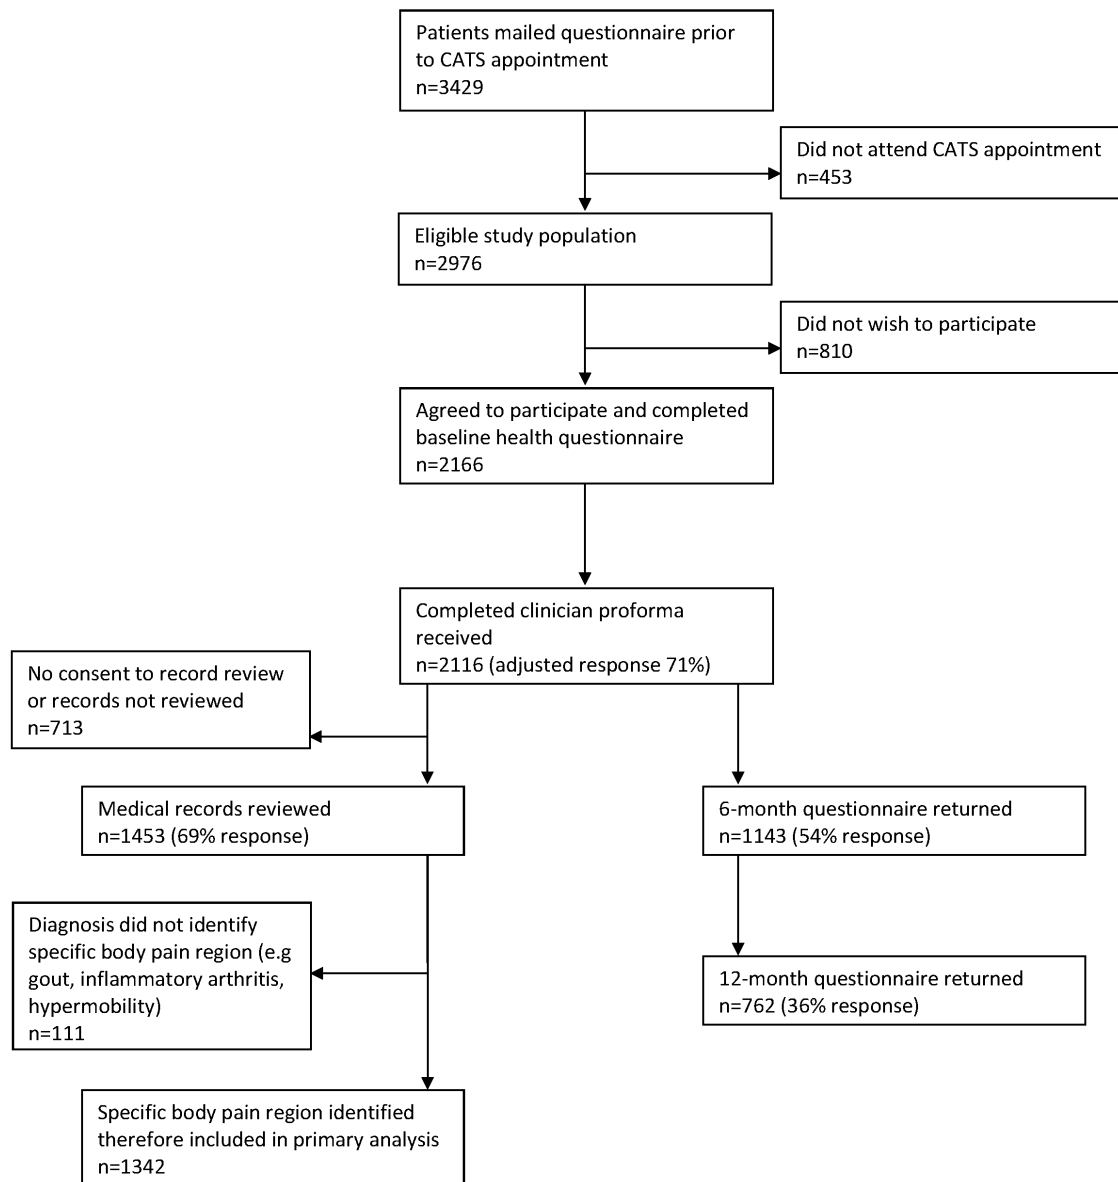

Supplement: inline-supplementary-material-1 [file inline-supplementary-material-1.pdf]
